# Supplementary material
Source: MDPI journal article supplement (https://www.mdpi.com/2673-9992/14/1/75)
Supplement: s1 [file s1]

Nusaiba A. Babiker<sup>1</sup>, Ahmed T. Negmeldin<sup>1,2,3</sup>, Eman M. El-Labbad<sup>1,4</sup>

<sup>1</sup> Department of Pharmaceutical Sciences, College of Pharmacy, Gulf Medical University, Ajman, UAE, <sup>2</sup> Thumbay Research Institute for Precision Medicine (TRIPM), Gulf Medical University, Ajman, UAE, <sup>3</sup> Department of Pharmaceutical Organic Chemistry, Faculty of Pharmacy, Cairo University, Cairo, Egypt, <sup>4</sup> Pharmaceutical Chemistry Department, Faculty of Pharmacy, Ain Shams University, Abbassia 11566, Cairo, Egypt

## Abstract

**Transforming Growth Factor- $\beta$  Receptor type 1 (TGF- $\beta$ R1)** is an important anticancer target involved in promoting cell proliferation, progression and metastasis through induction of angiogenesis and suppression of immunological responses during the late stage of malignancy. **Tranilast** was initially approved for the treatment of bronchial asthma and allergic conditions in 1982. Later, it was revealed that Tranilast has numerous effects on cancer hallmarks, including immune evasion and sustained proliferation via inhibition of TGF- $\beta$ R1. This research describes the design of a novel series of anthranilate derivatives having various modes of interactions with TGF- $\beta$ R1 compared with Tranilast. A database of novel Tranilast analogues was generated using MOE software using Fragment-Based Drug Design. Representative compounds were selected from the database and docked in the identified binding site of TGF- $\beta$ R1. Several compounds showed higher binding affinity for TGF- $\beta$ R1 compared with the lead compound in this work, Tranilast. Compounds with high docking scores contained a positively charged amine group that interacted with Asp290 or a negatively charged carboxylate group with Lys 335 in the TGF- $\beta$ R1 ATP binding site. Also, compounds containing an aromatic group showed high docking scores through interacting with Ser287, Lys337 or Ile 211. Compounds A11, A14, A16, and B5 which had the best poses in terms of binding interactions and docking scores to the binding site will be considered for further synthesis and biological evaluation.

Keywords: TGF- $\beta$ R1; Tranilast; FBDD

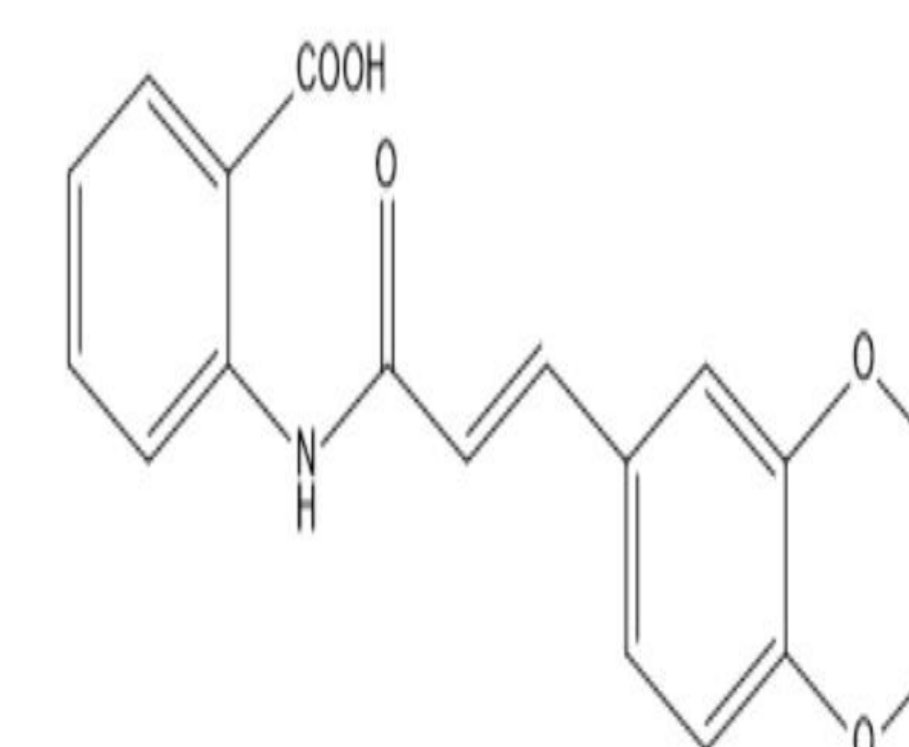

Tranilast

## Introduction

**Transforming Growth Factor- $\beta$  Receptor type 1 (TGF- $\beta$ R1)** is an important anticancer target involved in promoting cell proliferation, progression and metastasis through induction of angiogenesis and suppression of immunological responses during the late stage of malignancy<sup>(1,2)</sup>. **Tranilast** was initially approved for the treatment of bronchial asthma and allergic conditions in 1982. Later, it was revealed that Tranilast has numerous effects on cancer hallmarks, including immune evasion and sustained proliferation via inhibition of TGF- $\beta$ R1<sup>(3)</sup>.

## Objective

This study aims to design two novel series of Tranilast analogues having various modes of interactions with TGF $\beta$ R1 compared with Tranilast. Besides, the biological evaluation will be conducted to evaluate the newly designed compounds' anticancer activity. The compounds with promising results could be used as anticancer agents.

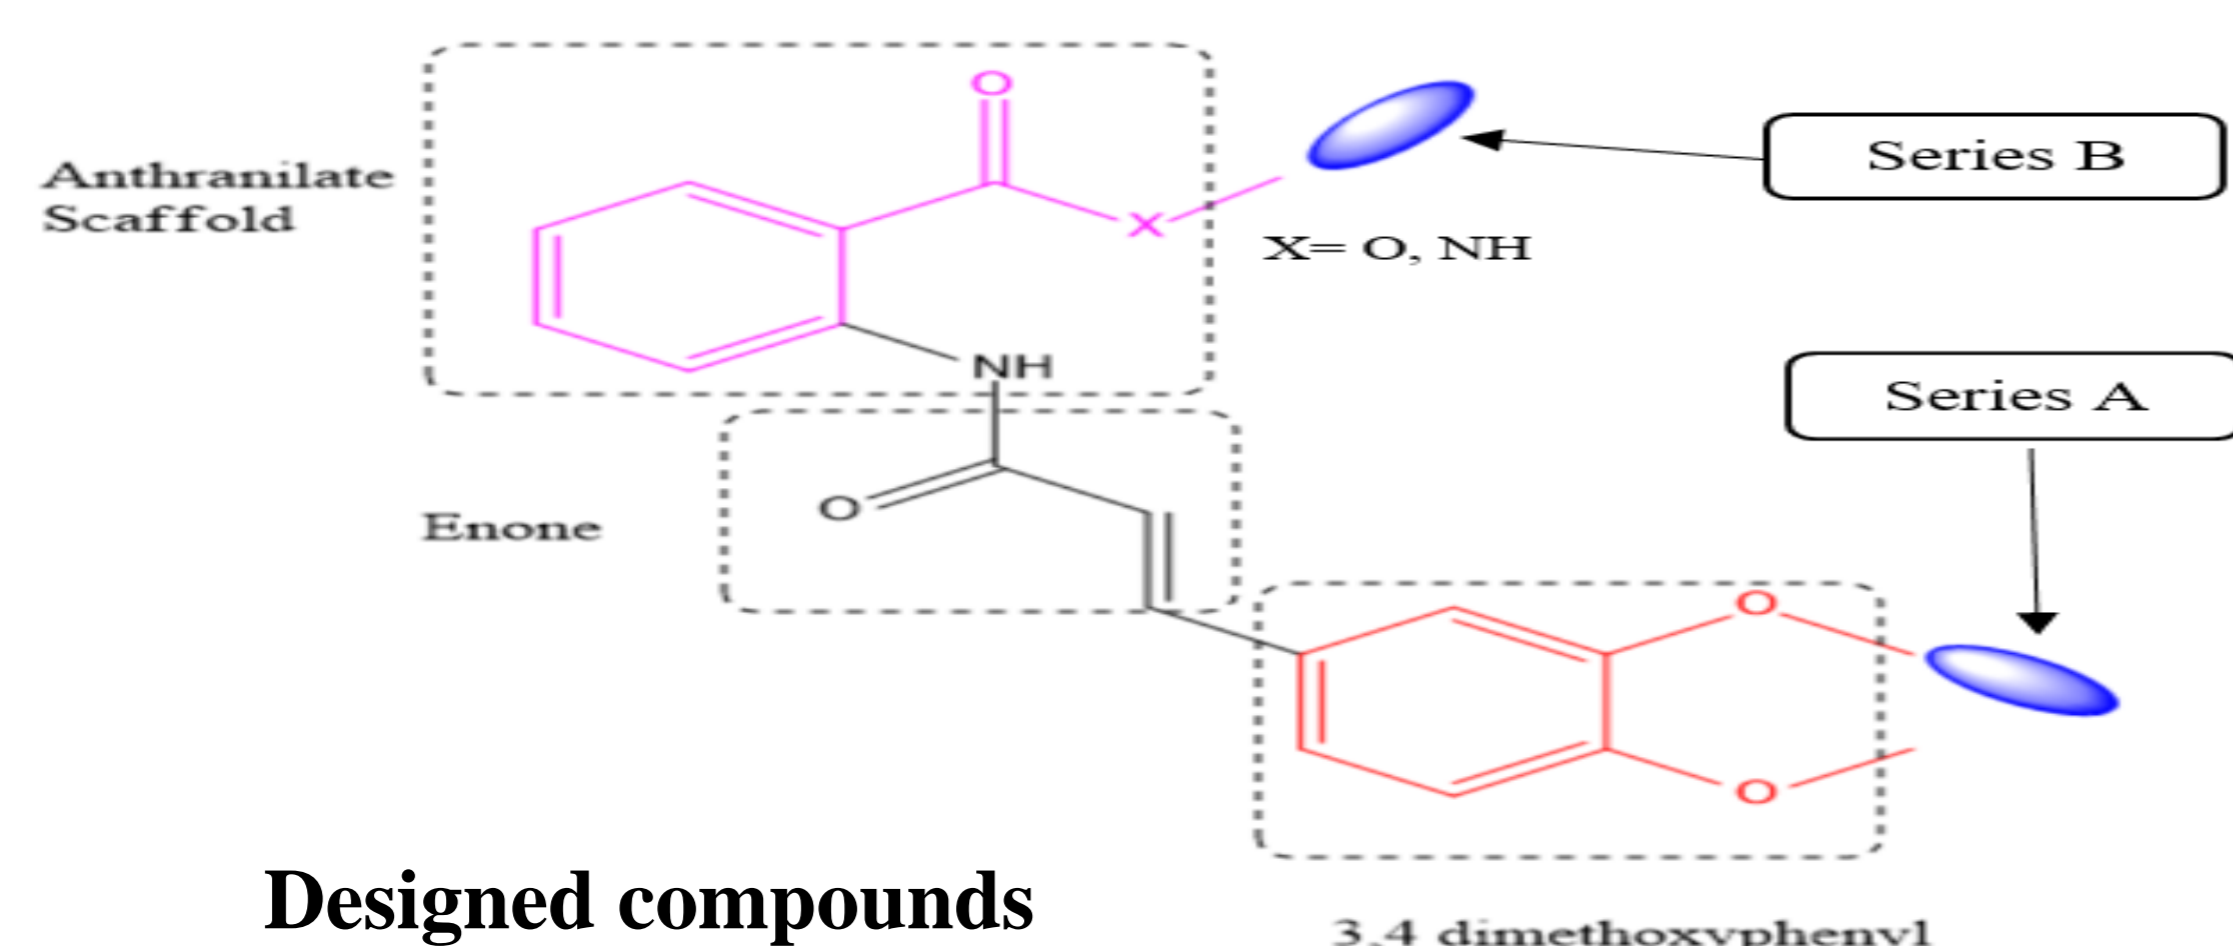

Designed compounds

## Method

➤ MOE software was used to generate a database composed of two series of Tranilast analogues utilizing Fragment-Based Drug Design technique. Series A contained compounds generated through the addition of new fragments in 3,4 dimethoxyphenol position. While series B was generated via esterification and amidation of the Anthranilate Scaffold.

➤ Compounds of series A and B were docked in the identified and validated ATP binding pocket of TGF- $\beta$ R1. The binding energy difference (S) was the method of predicting the binding affinity of the designed compounds.

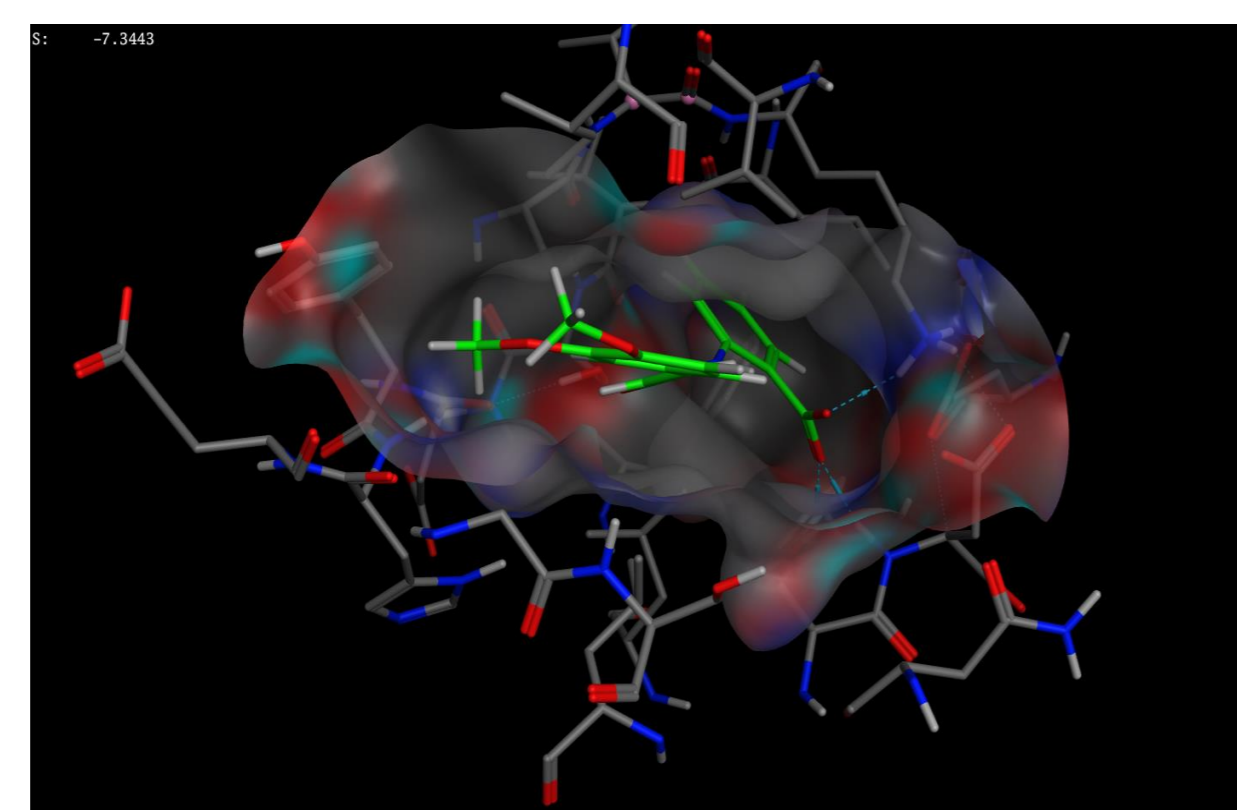

Figure 1: ATP binding pocket of TGF- $\beta$ R1 docked with Tranilast which is shown as green sticks (S = -7.3443).

## Results

Compounds of series A that had high docking scores, their fragments made ionic interactions with Asp290 or Lys 335. Additionally, compounds containing a fragment possessing aromatic ring also showed high docking scores through interacting with Ser287, Lys337 or Ile 211.

Table 1: Docking scores of series A. Entry 1 is Tranilast.

|   | mol       | mseq | S       | rmsd_refine | E_conf    |
|---|-----------|------|---------|-------------|-----------|
| 1 | Tranilast | 1    | -7.3443 | 1.1520      | -77.9529  |
| 2 | A11       | 11   | -9.0141 | 2.0814      | -40.3897  |
| 3 | A14       | 14   | -9.0100 | 2.0812      | -40.3895  |
| 4 | A16       | 16   | -8.9631 | 1.4396      | -44.6193  |
| 5 | A2        | 2    | -8.8573 | 1.5145      | -27.8976  |
| 6 | A20       | 20   | -8.8416 | 1.9310      | -101.3558 |

Compounds of Series B that had high docking scores, their fragments made ionic interactions with Glu 209 or Asp 351 or hydrogen bonding with His 283, Lys 337, Ile 211 or Gly 214.

Table 2: Docking scores of series B. entry 1 is Tranilast.

|   | Mol       | mseq | S       | rmsd_refine | E_conf   |
|---|-----------|------|---------|-------------|----------|
| 1 | Tranilast | 1    | -7.3443 | 1.1861      | -94.8551 |
| 2 | B5        | 5    | -8.9228 | 1.3230      | -42.3915 |
| 3 | B7        | 7    | -8.8806 | 1.2363      | -17.5674 |
| 4 | B6        | 6    | -8.8505 | 2.0372      | -12.9925 |
| 5 | B4        | 4    | -8.5615 | 1.3513      | -44.7362 |

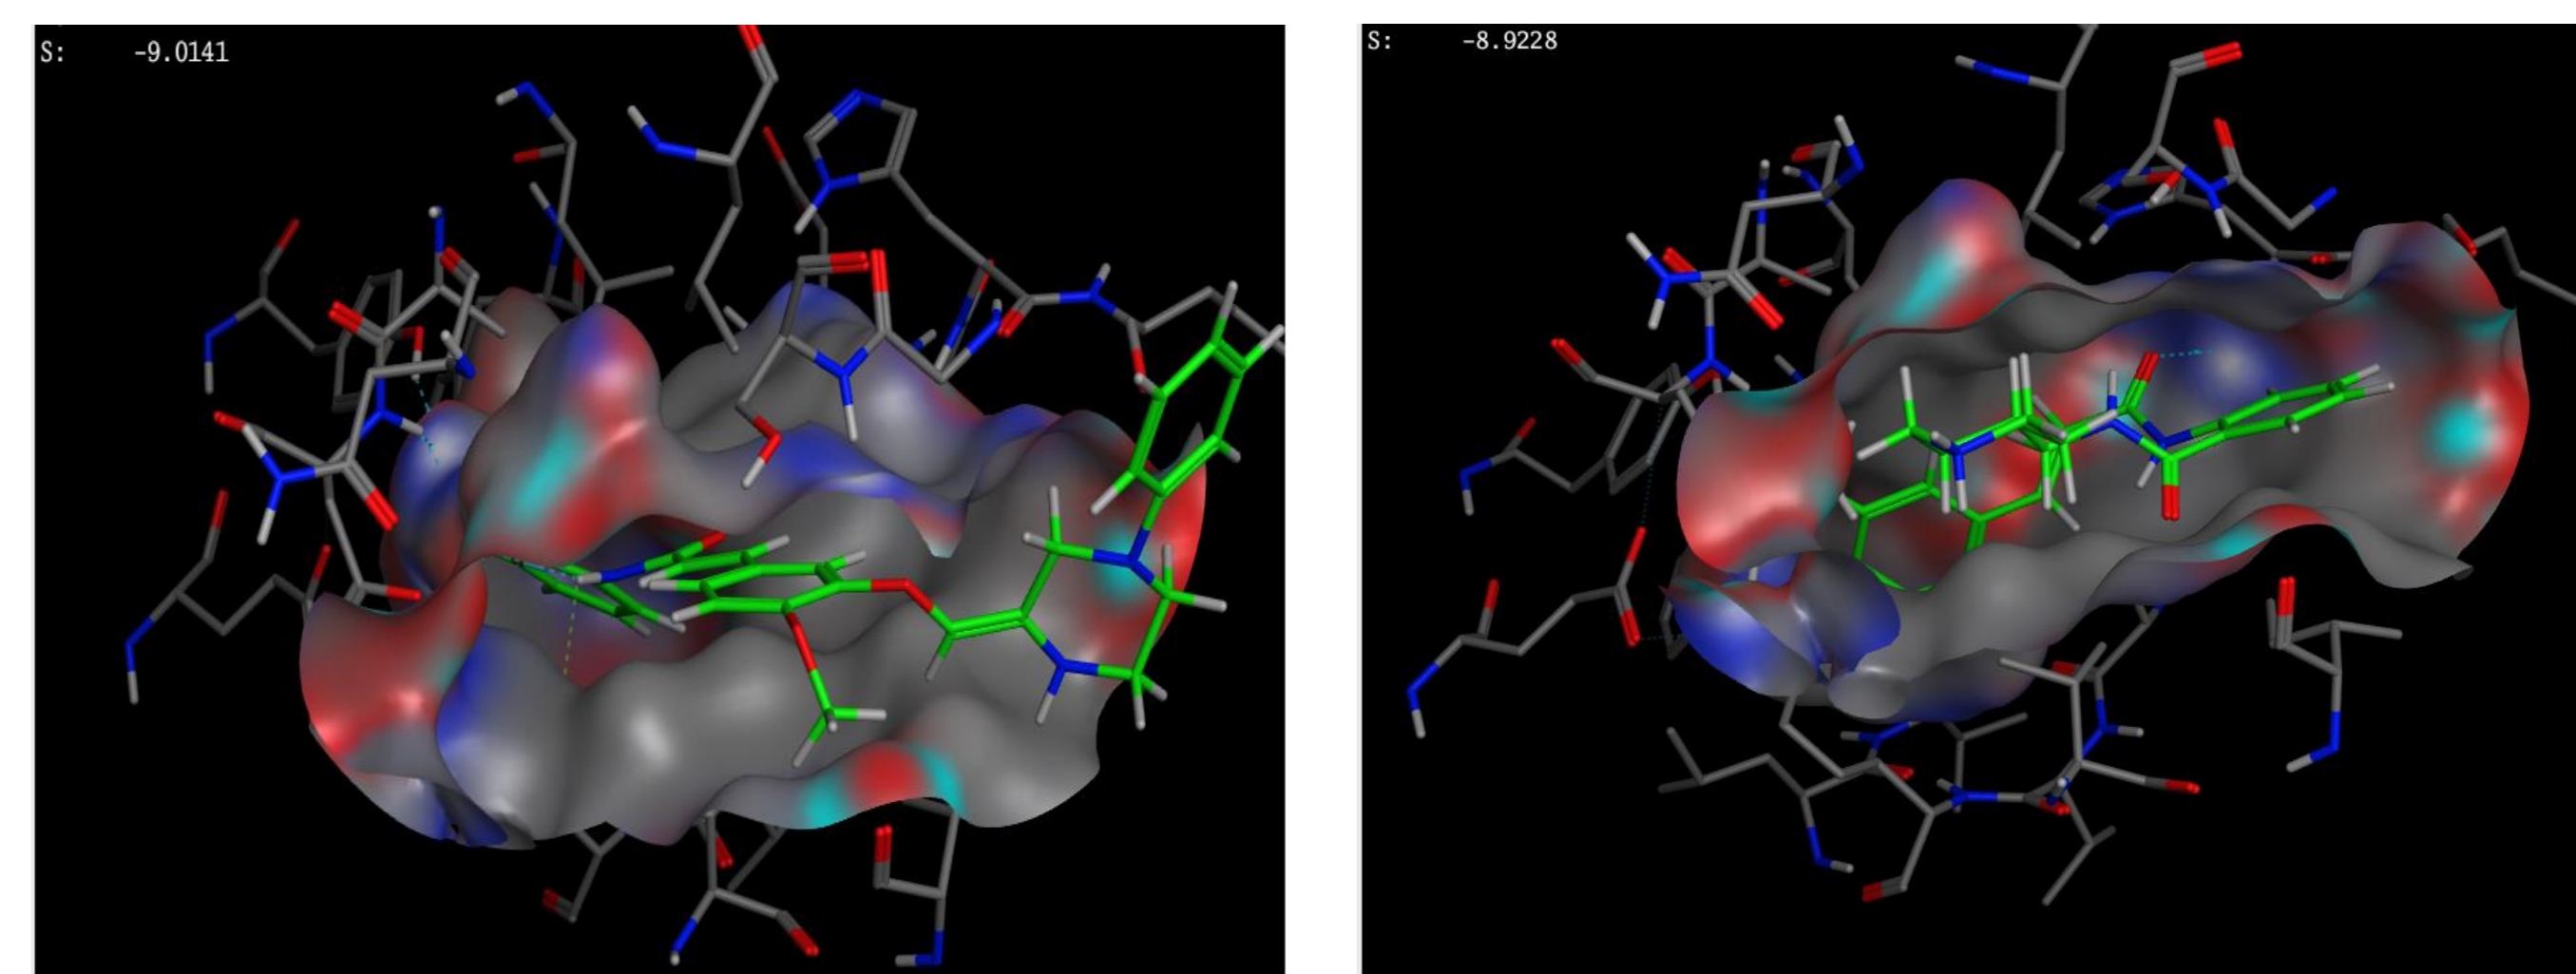

Figure 3: ATP binding pocket of TGF- $\beta$ R1 docked with A11 and B5.

## Conclusion and Future Plan

- Compounds A11, A14, A16, and B5 had the best poses in terms of binding interactions and docking scores to the ATP binding pocket of TGF $\beta$ R1.
- Compounds A11, A14, A16, and B5 will be synthesized according to different synthesis schemes, followed by structural validation of the synthesized compounds by different spectroscopic techniques (NMR, IR, mass spectrometry and elemental analysis).
- Synthesized compounds will be evaluated for anticancer activity using, Determination of TGF- $\beta$ R1 activity, Cell cycle analysis and Annexin V-FITC apoptosis assay.

## References

1. Morikawa M, Derynck R, Miyazono K. TGF- $\beta$  and the TGF- $\beta$  family: Context-dependent roles in cell and tissue physiology. Vol. 8, Cold Spring Harbor Perspectives in Biology. Cold Spring Harbor Laboratory Press; 2016.
2. Zhao M, Mishra L, Deng C-X. The role of TGF- $\beta$ /SMAD4 signaling in cancer. Int J Biol Sci [Internet]. 2018 Jan 12;14(2):111–23. Available from: <https://pubmed.ncbi.nlm.nih.gov/29483830>
3. Osman S, Raza A, Al-Zaidan L, Inchakalody VP, Merhi M, Prabhu KS, et al. Anti-cancer effects of Tranilast: An update. Biomed Pharmacother [Internet]. 2021;141:111844. Available from: <https://www.sciencedirect.com/science/article/pii/S0753332221006260>
4. Molecular Operating Environment Software, MOE,2020.09.
